# Supplementary material for: Influenza-associated pneumonia hospitalizations in Uganda, 2013-2016
Source: PubMed Central journal article supplement (PMC6629074; doi:10.1371/journal.pone.0219012), 2019-07-15
Supplement: pone.0219012.s001.pdf [file pone.0219012.s001.pdf]

**Table A:** Annual age-specific population by age group and study site, 2013-2016

| Year    | Age Group   | Wakiso District | Mbarara District | Tororo District | Combined Districts |
|---------|-------------|-----------------|------------------|-----------------|--------------------|
| 2013    | <2 years    | 137,239         | 32,475           | 35,529          | 205,243            |
|         | 2-4 years   | 205,857         | 48,711           | 53,293          | 307,861            |
|         | <5 years    | 343,096         | 81,186           | 88,822          | 513,104            |
|         | 5-14 years  | 585,394         | 138,516          | 151,544         | 875,454            |
|         | 15-49 years | 856,767         | 202,729          | 221,797         | 1,281,293          |
|         | 50-64 years | 96,920          | 22,934           | 25,091          | 144,945            |
|         | ≥65 years   | 56,215          | 13,302           | 14,553          | 84,070             |
|         | ≥5 years    | 1,595,296       | 377,481          | 412,985         | 2,385,762          |
|         | All ages    | 1,938,392       | 458,667          | 501,807         | 2,898,866          |
| 2014    | <2 years    | 141,418         | 33,463           | 36,610          | 211,491            |
|         | 2-4 years   | 212,126         | 50,194           | 54,915          | 317,235            |
|         | <5 years    | 353,544         | 83,657           | 91,525          | 528,726            |
|         | 5-14 years  | 603,221         | 142,734          | 156,159         | 902,114            |
|         | 15-49 years | 882,859         | 208,903          | 228,551         | 1,320,313          |
|         | 50-64 years | 99,871          | 23,632           | 25,855          | 149,358            |
|         | ≥65 years   | 57,926          | 13,707           | 14,996          | 86,629             |
|         | ≥5 years    | 1,643,877       | 388,976          | 425,561         | 2,458,414          |
|         | All ages    | 1,997,421       | 472,633          | 517,086         | 2,987,140          |
| 2015    | <2 years    | 145,725         | 34,483           | 37,725          | 217,933            |
|         | 2-4 years   | 218,587         | 51,723           | 56,588          | 326,898            |
|         | <5 years    | 364,312         | 86,206           | 94,313          | 544,831            |
|         | 5-14 years  | 621,592         | 147,081          | 160,915         | 929,588            |
|         | 15-49 years | 909,747         | 215,266          | 235,512         | 1,360,525          |
|         | 50-64 years | 102,913         | 24,352           | 26,643          | 153,908            |
|         | ≥65 years   | 59,691          | 14,125           | 15,453          | 89,269             |
|         | ≥5 years    | 1,693,943       | 400,824          | 438,523         | 2,533,290          |
|         | All ages    | 2,058,255       | 487,030          | 532,836         | 3,078,121          |
| 2016    | <2 years    | 150,163         | 35,533           | 38,874          | 224,570            |
|         | 2-4 years   | 225,244         | 53,298           | 58,311          | 336,853            |
|         | <5 years    | 375,407         | 88,831           | 97,185          | 561,423            |
|         | 5-14 years  | 640,523         | 151,561          | 165,816         | 957,900            |
|         | 15-49 years | 937,452         | 221,821          | 242,684         | 1,401,957          |
|         | 50-64 years | 106,047         | 25,094           | 27,454          | 158,595            |
|         | ≥65 years   | 61,508          | 14,555           | 15,924          | 91,987             |
|         | ≥5 years    | 1,745,530       | 413,031          | 451,878         | 2,610,439          |
|         | All ages    | 2,120,937       | 501,862          | 549,063         | 3,171,862          |
| 2013-16 | <2 years    | 143,637         | 33,989           | 37,185          | 214,811            |
|         | 2-4 years   | 215,454         | 50,982           | 55,777          | 322,213            |
|         | <5 years    | 359,090         | 84,970           | 92,962          | 537,022            |
|         | 5-14 years  | 612,683         | 144,973          | 158,609         | 916,265            |
|         | 15-49 years | 896,707         | 212,180          | 232,136         | 1,341,023          |
|         | 50-64 years | 101,438         | 24,003           | 26,261          | 151,702            |
|         | ≥65 years   | 58,835          | 13,923           | 15,232          | 87,990             |
|         | ≥5 years    | 1,669,662       | 395,078          | 432,237         | 2,496,977          |
|         | All ages    | 2,028,752       | 480,048          | 525,198         | 3,033,998          |

**Table B:** Annual age-specific rate (per 100,000 persons) of pneumonia hospitalizations by age group and study site, 2013-2016

| Year     | Age Group       | Wakiso District    | Mbarara District   | Tororo District    | Combined Districts |
|----------|-----------------|--------------------|--------------------|--------------------|--------------------|
|          |                 | Rate (95% CI)      | Rate (95% CI)      | Rate (95% CI)      | Rate (95% CI)      |
| 2013     | <2 years        | 2561 (2084 - 3307) | 4610 (3982 - 5311) | 5593 (5044 - 6273) | 3410 (2897 - 4137) |
|          | 2-4 years       | 741 (603 - 957)    | 1337 (1154 - 1539) | 1618 (1458 - 1814) | 987 (838 - 1197)   |
|          | <5 years        | 1469 (1195 - 1897) | 2646 (2285 - 3048) | 3208 (2893 - 3598) | 1956 (1662 - 2374) |
|          | 5-14 years      | 135 (106 - 165)    | 444 (385 - 506)    | 660 (604 - 737)    | 274 (237 - 318)    |
|          | 15-49 years     | 22 (17 - 27)       | 72 (62 - 82)       | 106 (97 - 119)     | 44 (38 - 51)       |
|          | 50-64 years     | 62 (50 - 77)       | 210 (184 - 240)    | 303 (279 - 339)    | 127 (111 - 148)    |
|          | ≥65 years       | 98 (79 - 121)      | 324 (279 - 369)    | 468 (427 - 523)    | 198 (171 - 230)    |
|          | ≥5 years        | 68 (54 - 84)       | 226 (196 - 257)    | 334 (306 - 373)    | 139 (120 - 161)    |
| All ages | 316 (262 - 392) | 654 (579 - 737)    | 843 (774 - 923)    | 461 (401 - 538)    |                    |
| 2014     | <2 years        | 1942 (1557 - 2491) | 4217 (3578 - 4880) | 4040 (3622 - 4588) | 2665 (2234 - 3232) |
|          | 2-4 years       | 562 (451 - 720)    | 1224 (1038 - 1415) | 1171 (1049 - 1329) | 772 (647 - 936)    |
|          | <5 years        | 1114 (893 - 1429)  | 2421 (2054 - 2800) | 2319 (2079 - 2633) | 1530 (1282 - 1855) |
|          | 5-14 years      | 145 (114 - 179)    | 376 (320 - 431)    | 535 (492 - 601)    | 249 (212 - 292)    |
|          | 15-49 years     | 24 (19 - 29)       | 61 (52 - 69)       | 86 (79 - 97)       | 40 (34 - 47)       |
|          | 50-64 years     | 69 (54 - 84)       | 174 (149 - 199)    | 244 (225 - 275)    | 116 (98 - 135)     |
|          | ≥65 years       | 104 (82 - 128)     | 278 (234 - 314)    | 381 (347 - 427)    | 179 (152 - 209)    |
|          | ≥5 years        | 74 (58 - 91)       | 191 (162 - 219)    | 271 (249 - 304)    | 127 (108 - 148)    |
| All ages | 258 (214 - 317) | 586 (510 - 662)    | 633 (583 - 701)    | 375 (324 - 438)    |                    |
| 2015     | <2 years        | 1879 (1521 - 2401) | 2454 (2100 - 2795) | 3712 (3356 - 4227) | 2287 (1930 - 2779) |
|          | 2-4 years       | 544 (440 - 695)    | 712 (610 - 811)    | 1077 (974 - 1226)  | 663 (559 - 805)    |
|          | <5 years        | 1078 (873 - 1377)  | 1409 (1206 - 1604) | 2131 (1927 - 2427) | 1313 (1108 - 1595) |
|          | 5-14 years      | 133 (103 - 163)    | 378 (322 - 428)    | 470 (430 - 528)    | 230 (195 - 268)    |
|          | 15-49 years     | 22 (17 - 27)       | 61 (53 - 70)       | 75 (69 - 85)       | 37 (32 - 43)       |
|          | 50-64 years     | 63 (49 - 77)       | 177 (152 - 202)    | 222 (203 - 248)    | 108 (92 - 127)     |
|          | ≥65 years       | 96 (74 - 118)      | 277 (241 - 319)    | 337 (311 - 382)    | 166 (142 - 195)    |
|          | ≥5 years        | 68 (53 - 83)       | 192 (164 - 218)    | 238 (218 - 268)    | 117 (99 - 136)     |
| All ages | 247 (208 - 301) | 407 (359 - 456)    | 573 (528 - 637)    | 329 (287 - 384)    |                    |
| 2016     | <2 years        | 1887 (1530 - 2414) | 2455 (2111 - 2819) | 3839 (3442 - 4316) | 2315 (1953 - 2807) |
|          | 2-4 years       | 546 (443 - 698)    | 713 (614 - 818)    | 1112 (997 - 1248)  | 671 (566 - 812)    |
|          | <5 years        | 1083 (878 - 1384)  | 1410 (1213 - 1618) | 2202 (1975 - 2475) | 1328 (1121 - 1611) |
|          | 5-14 years      | 144 (112 - 176)    | 361 (311 - 410)    | 393 (359 - 440)    | 221 (186 - 259)    |
|          | 15-49 years     | 23 (18 - 28)       | 59 (51 - 67)       | 63 (58 - 71)       | 36 (30 - 42)       |
|          | 50-64 years     | 67 (52 - 83)       | 172 (148 - 196)    | 186 (168 - 208)    | 105 (88 - 122)     |
|          | ≥65 years       | 105 (82 - 128)     | 262 (227 - 296)    | 289 (264 - 321)    | 161 (136 - 187)    |
|          | ≥5 years        | 73 (57 - 89)       | 184 (158 - 209)    | 200 (182 - 223)    | 112 (95 - 132)     |
| All ages | 252 (210 - 308) | 401 (355 - 452)    | 554 (506 - 612)    | 328 (284 - 384)    |                    |
| 2013-16  | <2 years        | 2060 (1667 - 2643) | 3403 (2916 - 3914) | 4275 (3848 - 4826) | 2656 (2242 - 3222) |
|          | 2-4 years       | 596 (482 - 765)    | 988 (846 - 1135)   | 1238 (1114 - 1397) | 769 (649 - 933)    |
|          | <5 years        | 1182 (956 - 1516)  | 1954 (1674 - 2247) | 2453 (2208 - 2770) | 1524 (1286 - 1849) |
|          | 5-14 years      | 139 (109 - 171)    | 389 (334 - 443)    | 511 (468 - 573)    | 243 (207 - 284)    |
|          | 15-49 years     | 23 (18 - 28)       | 63 (54 - 72)       | 82 (75 - 92)       | 39 (34 - 46)       |
|          | 50-64 years     | 65 (51 - 80)       | 183 (158 - 209)    | 238 (218 - 266)    | 114 (97 - 133)     |
|          | ≥65 years       | 101 (79 - 124)     | 284 (245 - 324)    | 367 (335 - 411)    | 176 (150 - 205)    |
|          | ≥5 years        | 71 (55 - 87)       | 198 (170 - 225)    | 259 (237 - 290)    | 123 (105 - 144)    |
| All ages | 267 (223 - 329) | 508 (448 - 573)    | 647 (595 - 715)    | 371 (323 - 434)    |                    |

**Table C:** Annual age-specific rate (per 100,000 persons) of influenza-associated pneumonia hospitalizations by age group and study site, 2013-2016

| Year    | Age Group   | Wakiso District | Mbarara District | Tororo District | Combined Districts |
|---------|-------------|-----------------|------------------|-----------------|--------------------|
|         |             | Rate (95% CI)   | Rate (95% CI)    | Rate (95% CI)   | Rate (95% CI)      |
| 2013    | <2 years    | 116 (59 - 192)  | 207 (118 - 327)  | 251 (141 - 380) | 153 (82 - 246)     |
|         | 2-4 years   | 41 (15 - 74)    | 74 (27 - 130)    | 89 (34 - 160)   | 54 (20 - 98)       |
|         | <5 years    | 71 (42 - 110)   | 127 (79 - 182)   | 154 (94 - 222)  | 94 (57 - 141)      |
|         | 5-14 years  | 19 (9 - 32)     | 62 (27 - 101)    | 92 (39 - 149)   | 39 (17 - 64)       |
|         | 15-49 years | 4 (2 - 6)       | 10 (5 - 17)      | 15 (7 - 24)     | 7 (3 - 11)         |
|         | 50-64 years | 10 (5 - 16)     | 31 (14 - 48)     | 44 (20 - 72)    | 19 (9 - 31)        |
|         | ≥65 years   | 15 (8 - 24)     | 46 (23 - 76)     | 69 (28 - 110)   | 29 (14 - 47)       |
|         | ≥5 years    | 10 (5 - 17)     | 32 (14 - 52)     | 47 (20 - 76)    | 20 (9 - 33)        |
|         | All ages    | 21 (14 - 30)    | 49 (31 - 67)     | 66 (43 - 92)    | 33 (22 - 47)       |
| 2014    | <2 years    | 135 (88 - 192)  | 293 (204 - 392)  | 282 (197 - 380) | 185 (125 - 256)    |
|         | 2-4 years   | 65 (40 - 100)   | 142 (88 - 204)   | 135 (82 - 192)  | 89 (55 - 132)      |
|         | <5 years    | 93 (65 - 129)   | 203 (149 - 260)  | 194 (147 - 245) | 128 (92 - 170)     |
|         | 5-14 years  | 17 (7 - 29)     | 43 (17 - 75)     | 60 (24 - 102)   | 28 (11 - 49)       |
|         | 15-49 years | 3 (2 - 5)       | 7 (3 - 12)       | 10 (4 - 17)     | 5 (2 - 8)          |
|         | 50-64 years | 9 (4 - 14)      | 22 (9 - 38)      | 28 (12 - 50)    | 14 (6 - 23)        |
|         | ≥65 years   | 13 (6 - 21)     | 37 (15 - 59)     | 47 (21 - 74)    | 22 (10 - 36)       |
|         | ≥5 years    | 9 (4 - 15)      | 22 (9 - 38)      | 31 (12 - 52)    | 15 (6 - 25)        |
|         | All ages    | 24 (17 - 32)    | 54 (38 - 71)     | 60 (42 - 79)    | 35 (25 - 46)       |
| 2015    | <2 years    | 190 (129 - 278) | 250 (169 - 337)  | 377 (258 - 511) | 232 (157 - 328)    |
|         | 2-4 years   | 78 (48 - 121)   | 103 (62 - 149)   | 154 (94 - 227)  | 95 (58 - 144)      |
|         | <5 years    | 123 (92 - 172)  | 162 (121 - 205)  | 243 (180 - 319) | 150 (112 - 203)    |
|         | 5-14 years  | 19 (0 - 41)     | 55 (0 - 115)     | 68 (0 - 148)    | 33 (0 - 71)        |
|         | 15-49 years | 4 (0 - 7)       | 9 (0 - 19)       | 12 (0 - 24)     | 6 (0 - 12)         |
|         | 50-64 years | 10 (0 - 20)     | 29 (0 - 54)      | 34 (0 - 72)     | 17 (0 - 34)        |
|         | ≥65 years   | 16 (0 - 31)     | 43 (0 - 85)      | 52 (0 - 111)    | 26 (0 - 53)        |
|         | ≥5 years    | 10 (0 - 21)     | 28 (0 - 59)      | 35 (0 - 76)     | 17 (0 - 36)        |
|         | All ages    | 30 (21 - 43)    | 52 (28 - 79)     | 72 (44 - 110)   | 41 (26 - 60)       |
| 2016    | <2 years    | 115 (59 - 193)  | 150 (79 - 240)   | 235 (119 - 368) | 141 (73 - 231)     |
|         | 2-4 years   | 48 (11 - 105)   | 62 (16 - 132)    | 98 (25 - 191)   | 59 (14 - 125)      |
|         | <5 years    | 75 (39 - 122)   | 97 (53 - 156)    | 153 (84 - 228)  | 92 (49 - 146)      |
|         | 5-14 years  | 17 (10 - 26)    | 43 (25 - 62)     | 47 (29 - 66)    | 26 (16 - 38)       |
|         | 15-49 years | 3 (2 - 5)       | 8 (5 - 10)       | 8 (5 - 11)      | 5 (3 - 7)          |
|         | 50-64 years | 9 (5 - 13)      | 20 (12 - 32)     | 22 (15 - 33)    | 13 (8 - 19)        |
|         | ≥65 years   | 14 (9 - 20)     | 35 (21 - 49)     | 38 (26 - 51)    | 21 (14 - 30)       |
|         | ≥5 years    | 9 (5 - 13)      | 22 (13 - 32)     | 24 (15 - 34)    | 14 (8 - 20)        |
|         | All ages    | 21 (13 - 29)    | 36 (25 - 49)     | 47 (31 - 62)    | 28 (18 - 38)       |
| 2013-16 | <2 years    | 139 (84 - 214)  | 224 (142 - 323)  | 286 (179 - 410) | 178 (109 - 265)    |
|         | 2-4 years   | 58 (28 - 101)   | 95 (48 - 153)    | 119 (59 - 193)  | 75 (37 - 125)      |
|         | <5 years    | 91 (60 - 134)   | 147 (100 - 200)  | 186 (126 - 254) | 116 (78 - 165)     |
|         | 5-14 years  | 18 (7 - 32)     | 50 (17 - 88)     | 66 (23 - 116)   | 32 (11 - 55)       |
|         | 15-49 years | 3 (2 - 6)       | 9 (3 - 15)       | 11 (4 - 19)     | 6 (2 - 9)          |
|         | 50-64 years | 9 (3 - 16)      | 25 (9 - 42)      | 32 (12 - 56)    | 16 (6 - 27)        |
|         | ≥65 years   | 14 (6 - 24)     | 40 (15 - 67)     | 51 (19 - 86)    | 25 (9 - 41)        |
|         | ≥5 years    | 10 (4 - 16)     | 26 (9 - 45)      | 34 (12 - 59)    | 16 (6 - 28)        |
|         | All ages    | 24 (16 - 34)    | 47 (30 - 66)     | 61 (40 - 86)    | 34 (23 - 48)       |
