# Supplementary material for: Influenza-associated pneumonia hospitalizations in Uganda, 2013-2016
Source: PubMed Central journal article supplement (PMC6629074; doi:10.1371/journal.pone.0219012), 2019-07-15

**Fig A:** Annual age-specific percentage of SARI patients who tested positive for influenza, 2013-2016

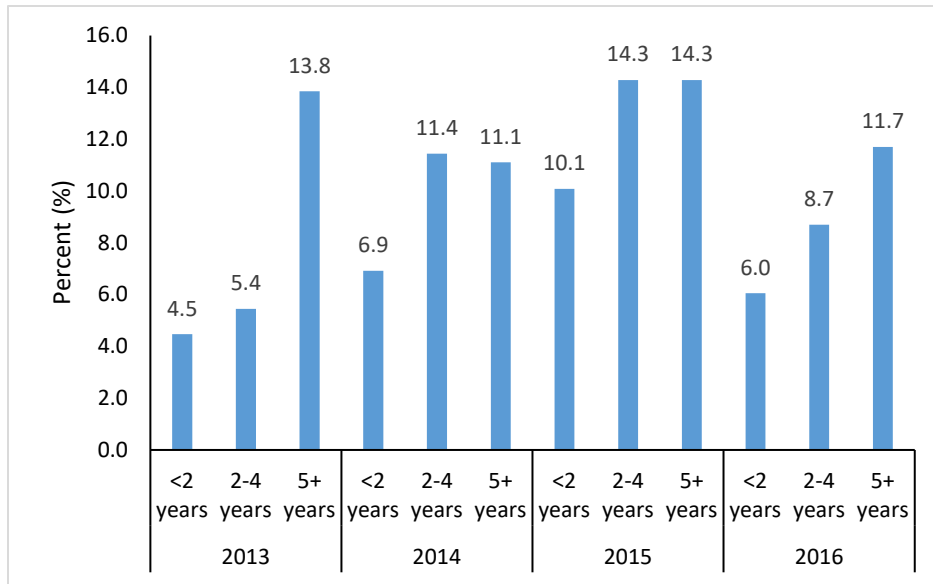

Supplement: pone.0219012.s002.pdf [file pone.0219012.s002.pdf]
